# Supplementary material
Source: publisher figshare collection journal article supplement (https://karger.figshare.com/ndownloader/files/13059344)
Supplement: Supplementary file 1 [file 13059344]

**Supplementary table 1: Chronic diseases present in patients with AOCLF.**

| **Chronic disease** | **AOCLF**  **(overall n = 32)** |
| --- | --- |
| HBV | 11 |
| ASH | 5 |
| Autoimmune hepatitis | 3 |
| Unknown | 3 |
| NASH | 2 |
| Toxic injury | 2 |
| HCV | 1 |
| ASH/NASH | 2 |
| ASH/Phenprocoumon | 1 |
| ASH/CASH (chemotherapy) | 1 |
| NASH/acute Hepatitis B | 1 |
